# Supplementary material
Source: PubMed Central journal article supplement (PMC3604721)

Figure 7A

IP : FLAG

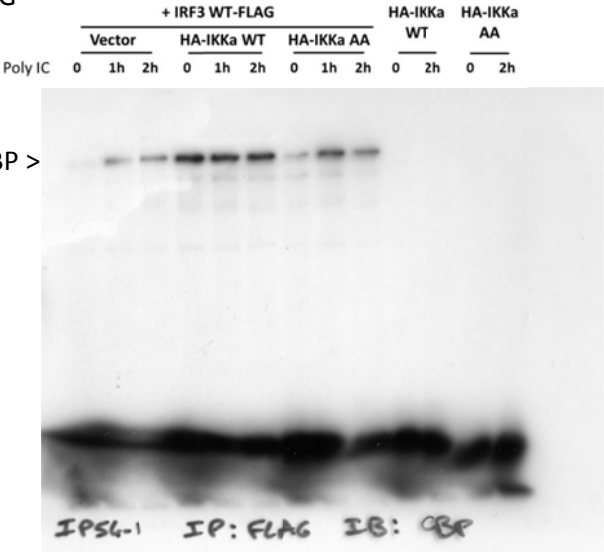

IP : FLAG

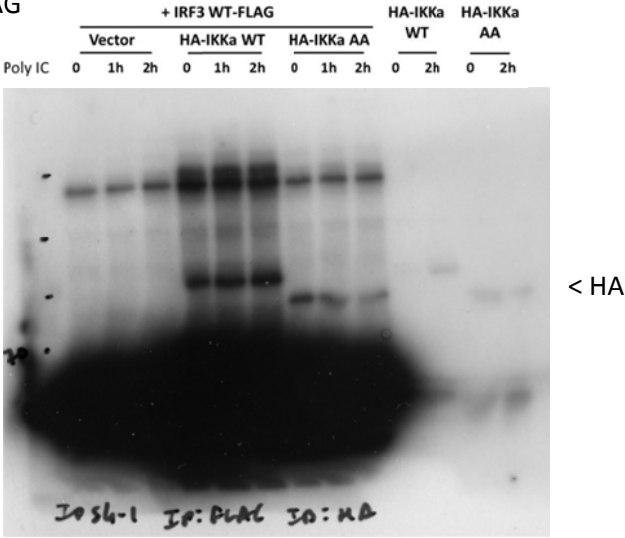

FLAG >

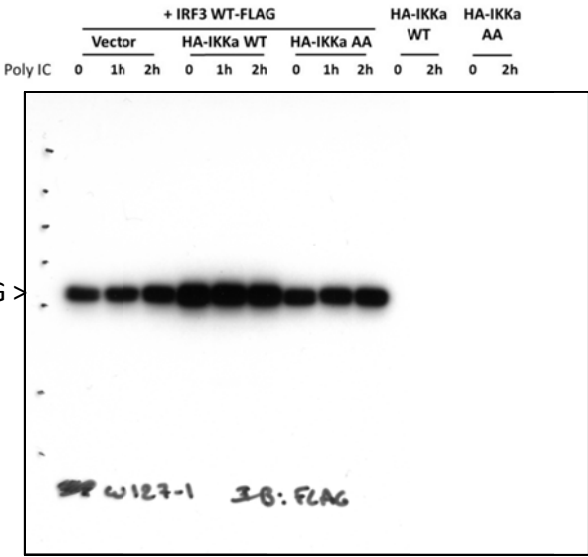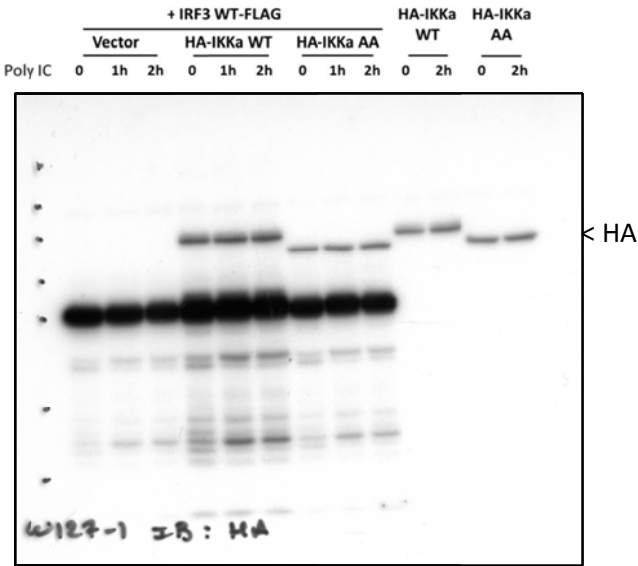

Figure 7D

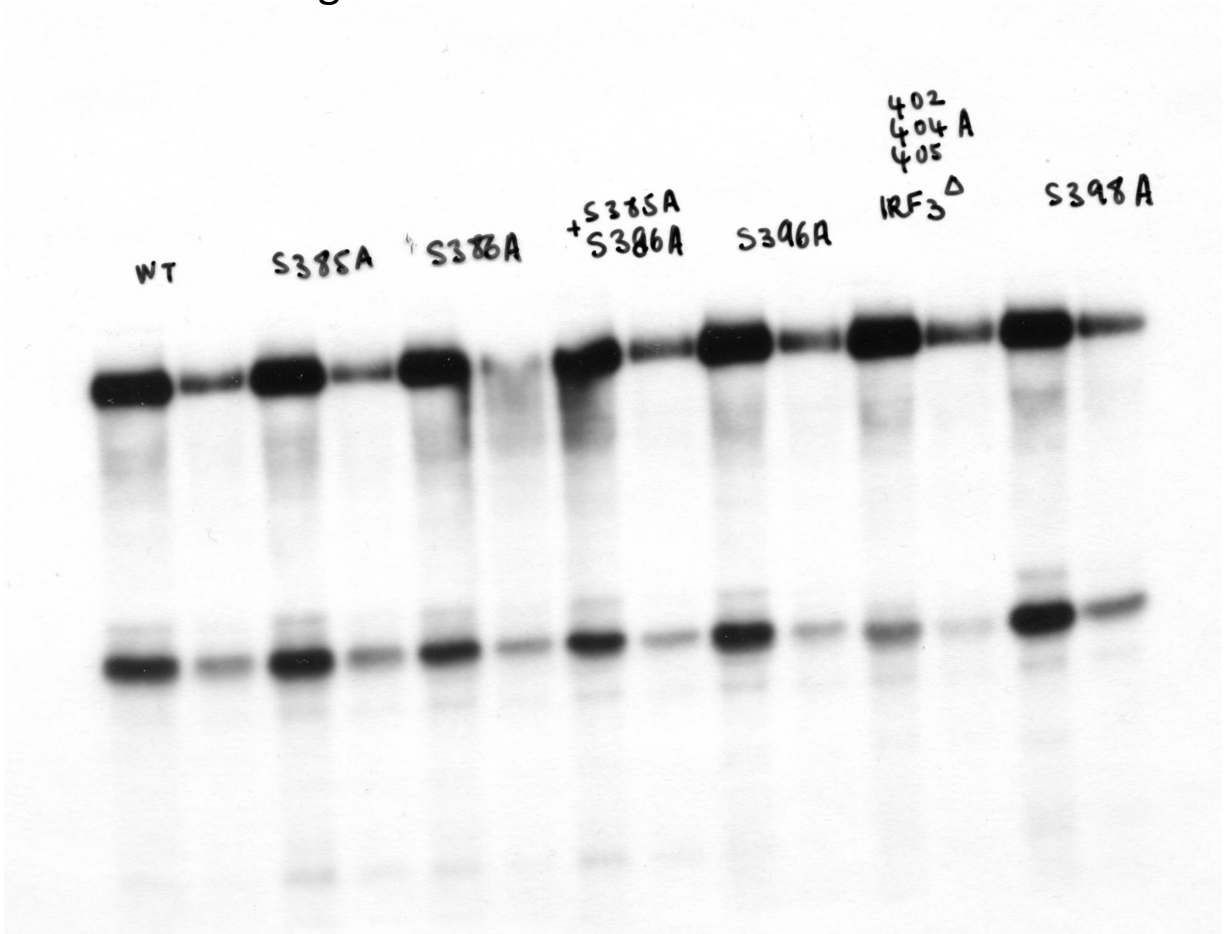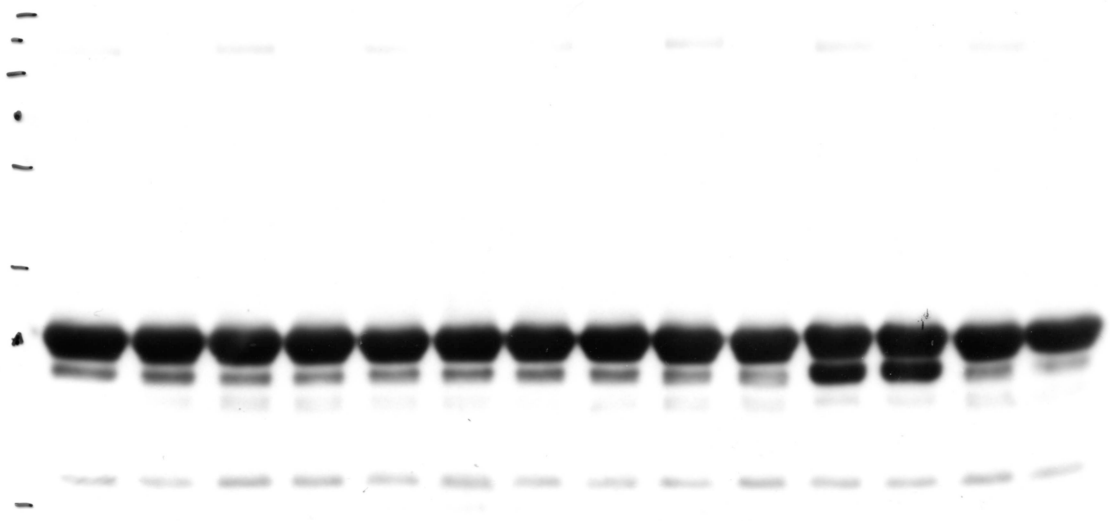

Supplement: emboj201328df7.pdf [file emboj201328df7.pdf]
